# Supplementary material for: Serum uromodulin associates with kidney function and outcome in a cohort of hospitalised COVID-19 patients
Source: PubMed Central journal article supplement — Sci Rep. 2024 Oct 25;14:25420. doi: 10.1038/s41598-024-76372-3 (PMC11512065; doi:10.1038/s41598-024-76372-3), 2024-10-25
Supplement: 41598_2024_76372_MOESM1_ESM.pdf [file 41598_2024_76372_MOESM1_ESM.pdf]

## Supplemental Material:

**Supplementary Table S1:** Descriptive Statistics: continuous baseline variables. U = urine, S = serum

| Variable                                                                 | Mean    | SD     | Median | Q1     | Q3       | Min   | Max     | N   |
|--------------------------------------------------------------------------|---------|--------|--------|--------|----------|-------|---------|-----|
| Age (years)                                                              | 69.13   | 16.08  | 73     | 59     | 82       | 18    | 97      | 378 |
| duration of hospital stay (days)                                         | 13.05   | 11.31  | 10     | 7      | 15       | 0     | 96      | 378 |
| Serum uromodulin (ng/ml)                                                 | 178.72  | 97.79  | 166.5  | 95     | 251      | 4     | 398     | 378 |
| Creatinine S (μmol/l)                                                    | 107.23  | 69.51  | 90     | 72     | 113      | 34    | 662     | 378 |
| Creatinine U (μmol/l)                                                    | 9673.13 | 5877.9 | 8734.5 | 5210   | 12842.25 | 724   | 32761   | 312 |
| Albumin S (g/l)                                                          | 35.51   | 5.38   | 35.7   | 31.9   | 38.9     | 16.8  | 56.3    | 341 |
| Albumin U (g/l)                                                          | 0.17    | 0.36   | 0.05   | 0.02   | 0.15     | 0     | 3.21    | 305 |
| Calcium S (mmol/l)                                                       | 2.75    | 11.22  | 2.13   | 2.03   | 2.21     | 1.64  | 206     | 330 |
| Chloride S (mmol/l)                                                      | 98.05   | 5.73   | 98.3   | 94.6   | 101.5    | 78.8  | 116.7   | 221 |
| Urea S                                                                   | 8.58    | 6.73   | 6.5    | 4.6    | 10.2     | 1.3   | 53.4    | 377 |
| Potassium S (mmol/l)                                                     | 4.16    | 0.56   | 4.1    | 3.8    | 4.5      | 2.6   | 7.3     | 376 |
| Sodium S (mmol/l)                                                        | 135.28  | 4.9    | 135.6  | 132.5  | 138.1    | 104.6 | 153.4   | 378 |
| Sodium U (mmol/l)                                                        | 59.73   | 41.21  | 51     | 28     | 84.75    | 10    | 249     | 322 |
| Protein S (g/l)                                                          | 63.72   | 7.01   | 63.6   | 59.7   | 68.1     | 35.1  | 90.6    | 349 |
| Protein U (mg/l)                                                         | 428.49  | 521.82 | 239    | 130.25 | 482      | 42    | 4511    | 298 |
| Phosphate S (mmol/l)                                                     | 1.08    | 0.4    | 1      | 0.85   | 1.2      | 0.5   | 2.9     | 59  |
| Osmolality U (mosmol/kg)                                                 | 515.38  | 216.54 | 490    | 351    | 663      | 91    | 1223    | 297 |
| Uric acid S (μmol/l)                                                     | 352.64  | 147.12 | 322.5  | 248.5  | 452.75   | 107   | 861     | 174 |
| Urine albumin-creatinine ratio (UACR) (g/g creatinine)                   | 0.17    | 0.4    | 0.06   | 0.02   | 0.17     | 0     | 4.38    | 291 |
| C-reactive protein (CRP) (mg/l)                                          | 77.27   | 68.62  | 64.6   | 26.75  | 104.45   | 0.9   | 397.7   | 375 |
| Interleukin-6 (IL-6) (ng/l)                                              | 113.04  | 723.79 | 37.25  | 18.52  | 80.97    | 1.5   | 12940   | 330 |
| Procalcitonin (PCT) (μg/l)                                               | 1.23    | 8.88   | 0.12   | 0.07   | 0.28     | 0.02  | 114     | 350 |
| Estimated glomerular filtration rate (eGFR) (ml/min/1.73m <sup>2</sup> ) | 66.92   | 27.52  | 67     | 46     | 87       | 6     | 137     | 377 |
| B-type natriuretic peptide (BNP) (ng/ml)                                 | 506.34  | 863.23 | 161.51 | 35.3   | 553.25   | 2.95  | 4132.23 | 87  |
| Lactate dehydrogenase (LDH) (μmol/l*s)                                   | 6.13    | 2.45   | 5.6    | 4.3    | 7.3      | 2.2   | 18.6    | 366 |
| Leucocytes (Gpt/l)                                                       | 6.88    | 3.46   | 6.3    | 4.5    | 8.1      | 1.6   | 27.5    | 378 |
| Cystatin C (mg/l)                                                        | 2.1     | 1.3    | 1.8    | 1.5    | 2.45     | 0.7   | 6.2     | 15  |
| HSP27 (ng/ml)                                                            | 6.37    | 3.11   | 5.87   | 4.11   | 8.32     | 0     | 23.6    | 243 |
| sST2 (ng/ml)                                                             | 7.62    | 1.86   | 7.85   | 6.58   | 8.95     | 0     | 11.3    | 243 |
| TNFR1 (ng/ml)                                                            | 3.23    | 2.74   | 2.35   | 1.72   | 3.86     | 0.49  | 24.9    | 243 |
| 20s Proteasome (mg)                                                      | 4.9     | 8.22   | 2.26   | 0      | 6.39     | 0     | 75.57   | 243 |
| Respiratory rate (breaths/min)                                           | 21.53   | 5.54   | 20     | 18     | 24       | 12    | 35      | 152 |
| Horovitz index (mmHg)                                                    | 275.6   | 106.73 | 280    | 209    | 340      | 60    | 633     | 133 |
| Peripheral oxygen saturation (%)                                         | 90.27   | 7.15   | 92     | 88     | 95       | 37    | 99      | 153 |
| Glasgow Coma Scale (points)                                              | 14.55   | 0.99   | 15     | 15     | 15       | 11    | 15      | 154 |
| D-dimer (μg/l)                                                           | 2846.69 | 4269   | 1231   | 656    | 2640     | 170   | 20000   | 117 |
| Platelets (Gpt/l)                                                        | 219.56  | 86.96  | 205    | 166.75 | 252.5    | 65    | 631     | 128 |
| Creatine kinase (μmol/l*s)                                               | 6.98    | 13.12  | 2.5    | 1      | 6.7      | 0.4   | 82      | 82  |
| Number of Antihypertensives                                              | 1.85    | 1.44   | 2      | 1      | 3        | 0     | 6       | 257 |

**Supplementary Table S2:** Descriptive Statistics: medication, separately for patients with/without Acute Kidney Injury (AKI)

| Variable                                                    | Group | no AKI |         | AKI    |         |
|-------------------------------------------------------------|-------|--------|---------|--------|---------|
|                                                             |       | Number | Percent | Number | Percent |
| <b>Angiotensin-converting enzyme inhibitor (ACEi)</b>       | No    | 100    | 56.18   | 78     | 43.82   |
|                                                             | Yes   | 38     | 48.10   | 41     | 51.90   |
| <b>Angiotensin receptor blocker (ARB)</b>                   | No    | 95     | 56.89   | 72     | 43.11   |
|                                                             | Yes   | 43     | 47.78   | 47     | 52.22   |
| <b>Calcium antagonists</b>                                  | No    | 120    | 53.57   | 104    | 46.43   |
|                                                             | Yes   | 17     | 53.12   | 15     | 46.88   |
| <b>Steroids</b>                                             | No    | 135    | 55.79   | 107    | 44.21   |
|                                                             | Yes   | 3      | 20.00   | 12     | 80.00   |
| <b>Mineralocorticoid receptor antagonists (MRAs)</b>        | No    | 131    | 56.71   | 100    | 43.29   |
|                                                             | Yes   | 6      | 27.27   | 16     | 72.73   |
| <b>Statins</b>                                              | No    | 101    | 56.71   | 63     | 38.41   |
|                                                             | Yes   | 37     | 39.78   | 56     | 60.22   |
| <b>Aspirin</b>                                              | No    | 114    | 56.72   | 87     | 43.28   |
|                                                             | Yes   | 24     | 42.86   | 32     | 57.14   |
| <b>Heparin</b>                                              | No    | 137    | 54.58   | 114    | 45.42   |
|                                                             | Yes   | 1      | 16.67   | 5      | 83.33   |
| <b>Non-vitamin K antagonist oral anticoagulants (NOACs)</b> | No    | 116    | 58.29   | 83     | 41.71   |
|                                                             | Yes   | 22     | 37.93   | 36     | 62.07   |
| <b>Vitamin K antagonists</b>                                | No    | 136    | 54.18   | 115    | 45.82   |
|                                                             | Yes   | 2      | 33.33   | 4      | 66.67   |

Supplementary Table S3: Pearson Correlation Coefficients with serum uromodulin. U = urine, S = serum.

| Variable                                                                | Pearson | 95% CI for Correlation |        | p-value |
|-------------------------------------------------------------------------|---------|------------------------|--------|---------|
|                                                                         |         | Lower                  | Upper  |         |
| Age                                                                     | -0.457  | -0.533                 | -0.373 | <0.001  |
| Creatinine S ( $\mu\text{mol/l}$ )                                      | -0.344  | -0.430                 | -0.252 | <0.001  |
| Creatinine U ( $\mu\text{mol/l}$ )                                      | 0.120   | 0.009                  | 0.228  | 0.035   |
| Albumin S (g/l)                                                         | 0.290   | 0.190                  | 0.384  | <0.001  |
| Albumin U (g/l)                                                         | -0.161  | -0.269                 | -0.050 | 0.005   |
| Calcium S (mmol/l)                                                      | 0.006   | -0.102                 | 0.114  | 0.909   |
| Chloride S                                                              | 0.012   | -0.120                 | 0.144  | 0.861   |
| Urea S (mmol/l)                                                         | -0.373  | -0.456                 | -0.282 | <0.001  |
| Potassium S (mmol/l)                                                    | -0.056  | -0.157                 | 0.045  | 0.275   |
| Sodium S (mmol/l)                                                       | 0.000   | -0.101                 | 0.101  | 0.998   |
| Sodium U (mmol/l)                                                       | 0.056   | -0.053                 | 0.164  | 0.315   |
| Protein S (g/l)                                                         | 0.172   | 0.069                  | 0.272  | 0.001   |
| Protein U (mg/l)                                                        | -0.099  | -0.210                 | 0.015  | 0.089   |
| Phosphate S (mmol/l)                                                    | -0.019  | -0.274                 | 0.238  | 0.884   |
| Osmolality U (mosmol/kg)                                                | 0.198   | 0.086                  | 0.305  | 0.001   |
| Uric acid S (mmol/l)                                                    | -0.478  | -0.585                 | -0.354 | <0.001  |
| Urine albumin-creatinine ratio (UACR) (g/g creatinine)                  | -0.222  | -0.329                 | -0.110 | <0.001  |
| C-reactive protein (CRP) (mg/l)                                         | -0.081  | -0.181                 | 0.020  | 0.116   |
| Interleukin-6 (IL-6) (ng/l)                                             | 0.044   | -0.064                 | 0.151  | 0.426   |
| Procalcitonin (PCT) ( $\mu\text{g/l}$ )                                 | -0.030  | -0.135                 | 0.075  | 0.571   |
| Estimated glomerular filtration rate (eGFR) ( $\text{ml/min/1.73m}^2$ ) | 0.585   | 0.514                  | 0.648  | <0.001  |
| B-type natriuretic peptide (BNP) (ng/l)                                 | -0.193  | -0.388                 | 0.018  | 0.073   |
| Lactate dehydrogenase (LDH) ( $\mu\text{mol/l}^2\text{s}$ )             | 0.042   | -0.061                 | 0.144  | 0.426   |
| Leucocytes (Gpt/l)                                                      | -0.102  | -0.201                 | -0.001 | 0.048   |
| Cystatin C (mg/l)                                                       | -0.428  | -0.771                 | 0.107  | 0.111   |
| HSP27 (ng/ml)                                                           | -0.027  | -0.152                 | 0.099  | 0.676   |
| sST2 (ng/ml)                                                            | -0.144  | -0.265                 | -0.018 | 0.025   |
| TNFR1 (ng/ml)                                                           | -0.111  | -0.233                 | 0.015  | 0.085   |
| 20s Proteasome (mg)                                                     | 0.053   | -0.073                 | 0.178  | 0.408   |
| Respiratory rate (breaths/min)                                          | -0.125  | -0.279                 | 0.035  | 0.124   |
| Horowitz index (mmHg)                                                   | 0.173   | 0.003                  | 0.333  | 0.046   |
| Peripheral oxygen saturation (%)                                        | 0.200   | 0.043                  | 0.348  | 0.013   |
| Glasgow Coma Scale (points)                                             | 0.269   | 0.115                  | 0.409  | 0.001   |
